# Supplementary material for: Attentional impulsivity in methamphetamine use disorder: Assessing its mediating role between nicotine dependence and methamphetamine use disorder severity in the Chinese population
Source: Research Square preprint supplement (doi:10.21203/rs.3.rs-8615424/v1), 2026-02-04
Supplement: Supplementary file 1 [file 5e96ab25c4cb85be5c7343b9.docx]

Table S1. Mediation model: impulsivity mediated the effects of nicotine dependence on MUD severity

|  | Dependent variable | Independent variable | *β* | *t* | *P* | *R2* | *F* |
| --- | --- | --- | --- | --- | --- | --- | --- |
| Model 1 | MUD severity | Nicotine dependence | 0.554 | 8.437 | <0.001 | 0.307 | 71.175*** |
| Model 2 | Impulsivity | Nicotine dependence | 0.376 | 5.141 | <0.001 | 0.141 | 26.430*** |
| Model 3 | MUD severity | Nicotine dependence | 0.444 | 6.610 | <0.001 | 0.380 | 49.001*** |
| Impulsivity | 0.292 | 4.349 | <0.001 |
| MUD: methamphetamine use disorder; β: standardised coefficients; ****P*<0.001; *P*<0.05 was considered significant. | | | | | | | |

Table S2. Effects of nicotine dependence on MUD severity mediated by impulsivity

|  | Effect | Boot SE | Boot LLCI | Boot ULCI | Relative effect |
| --- | --- | --- | --- | --- | --- |
| Total effect | 0.398 | 0.043 | 0.314 | 0.485 |  |
| Indirect effect | 0.079 | 0.022 | 0.040 | 0.126 | 19.85% |
| Direct effect | 0.319 | 0.047 | 0.231 | 0.413 | 80.15% |
| MUD: methamphetamine use disorder; Total effect: the total effect of nicotine dependence on MUD severity; Indirect effect: the mediating effect of nicotine dependence on MUD severity by impulsivity; Direct effect: the remaining effect of nicotine dependence on MUD severity not explained by the mediator included in the model; Relative effect value to total effect. | | | | | |

Table S3. Parallel multiple mediation model: AI, MI, and NPI mediated the effects of nicotine dependence on MUD severity

|  | Dependent variable | Independent variable | *β* | *t* | *P* | *R2* | *F* | |
| --- | --- | --- | --- | --- | --- | --- | --- | --- |
| Model 1 | MUD severity | Nicotine dependence | 0.554 | 8.437 | <0.001 | 0.307 | 71.175*** | |
| Model 2 | AI | Nicotine dependence | 0.322 | 4.317 | <0.001 | 0.104 | 18.639*** | |
| MI | 0.230 | 2.996 | 0.003 | 0.053 | 8.978** | |
| NPI | 0.405 | 5.615 | <0.001 | 0.164 | 31.525*** | |
| Model 3 | MUD severity | Nicotine dependence | 0.439 | 6.395 | <0.001 | 0.384 | 24.619*** | |
| AI | 0.185 | 2.109 | 0.037 |
| MI | 0.049 | 0.603 | 0.548 |
| NPI | 0.109 | 1.253 | 0.212 |
| MUD: methamphetamine use disorder; AI: attentional impulsivity; MI: motor impulsivity; NPI: non-planning impulsivity; β: standardised coefficients; ***P*<0.01, ****P*<0.001; *P*<0.05 was considered significant. | | | | | | | |

Table S4. Indirect effects of nicotine dependence on MUD severity mediated by AI, MI and NPI

|  | Effect | Boot SE | Boot LLCI | Boot ULCI |
| --- | --- | --- | --- | --- |
| Total indirect effect* | 0.083 | 0.024 | 0.041 | 0.133 |
| Indirect effect 1 (AI*) | 0.043 | 0.021 | 0.006 | 0.089 |
| Indirect effect 2 (MI) | 0.008 | 0.013 | -0.018 | 0.036 |
| Indirect effect 3 (NPI) | 0.032 | 0.024 | -0.012 | 0.084 |
| MUD: methamphetamine use disorder; AI: attentional impulsivity; MI: motor impulsivity; NPI: non-planning impulsivity; Indirect effect 1: the mediating effect of nicotine dependence on MUD severity by AI; Indirect effect 2: the mediating effect of nicotine dependence on MUD severity by MI; Indirect effect 3: the mediating effect of nicotine dependence on MUD severity by NPI. | | | | |

Table S5. Mediation model: AI mediated the effects of nicotine dependence on MUD severity

|  | Dependent variable | Independent variable | *β* | *t* | *P* | *R2* | *F* |
| --- | --- | --- | --- | --- | --- | --- | --- |
| Model 1 | MUD severity | Nicotine dependence | 0.554 | 8.437 | <0.001 | 0.307 | 71.175*** |
| Model 2 | AI | Nicotine dependence | 0.322 | 4.317 | <0.001 | 0.104 | 18.639*** |
| Model 3 | MUD severity | Nicotine dependence | 0.465 | 7.042 | <0.001 | 0.374 | 47.815*** |
| AI | 0.275 | 4.155 | 0.0001 |
| MUD: methamphetamine use disorder; AI: attentional impulsivity; β: standardised coefficients; ****P*<0.001; *P*<0.05 was considered significant. | | | | | | | |

Table S6. Effects of nicotine dependence on MUD severity mediated by AI

|  | Effect | Boot SE | Boot LLCI | Boot ULCI | Relative effect |
| --- | --- | --- | --- | --- | --- |
| Total effect | 0.398 | 0.043 | 0.314 | 0.485 |  |
| Indirect effect | 0.064 | 0.021 | 0.027 | 0.109 | 16.08% |
| Direct effect | 0.334 | 0.045 | 0.245 | 0.422 | 83.92% |
| MUD: methamphetamine use disorder; AI: attentional impulsivity; Total effect: the total effect of nicotine dependence on MUD severity; Indirect effect: the mediating effect of nicotine dependence on MUD severity by AI; Direct effect: the remaining effect of nicotine dependence on MUD severity not explained by the mediator included in the model; Relative effect value to total effect. | | | | | |

Table S7. Sensitivity analyses of mediation model: adjusted impulsivity mediated the effects of nicotine dependence on MUD severity

|  | Dependent variable | Independent variable | *β* | *t* | *P* | *R2* | *F* |
| --- | --- | --- | --- | --- | --- | --- | --- |
| Model 1 | MUD severity | Nicotine dependence | 0.522 | 7.485 | <0.001 | 0.272 | 56.020*** |
| Model 2 | Impulsivity | Nicotine dependence | 0.394 | 5.247 | <0.001 | 0.155 | 27.535*** |
| Model 3 | MUD severity | Nicotine dependence | 0.402 | 5.591 | <0.001 | 0.350 | 40.124*** |
| Impulsivity | 0.304 | 4.232 | <0.001 |
| MUD: methamphetamine use disorder; β: standardised coefficients; ****P*<0.001; *P*<0.05 was considered significant. | | | | | | | |

Table S8. Sensitivity analyses of effects of nicotine dependence on MUD severity mediated by adjusted impulsivity

|  | Effect | Boot SE | Boot LLCI | Boot ULCI | Relative effect |
| --- | --- | --- | --- | --- | --- |
| Total effect | 0.398 | 0.049 | 0.303 | 0.496 |  |
| Indirect effect | 0.091 | 0.026 | 0.046 | 0.146 | 22.86% |
| Direct effect | 0.307 | 0.054 | 0.205 | 0.414 | 77.14% |
| MUD: methamphetamine use disorder; Total effect: the total effect of nicotine dependence on MUD severity; Indirect effect: the mediating effect of nicotine dependence on MUD severity by impulsivity; Direct effect: the remaining effect of nicotine dependence on MUD severity not explained by the mediator included in the model; Relative effect value to total effect. | | | | | |
